# Supplementary material for: Electrostatic layer-by-layer construction of fibrous TMV biofilms
Source: Royal Society of Chemistry journal article supplement (doi:10.1039/c6nr06266k), 2016-12-22
Supplement: c6nr06266k1.pdf [file c6nr06266k1.pdf]

## Supporting Information

### Electrostatic layer-by-layer construction of fibrous TMV biofilms for applications in medicine

*Brylee David B. Tiu,<sup>1,2</sup> Daniel L. Kernan,<sup>1</sup> Sicily B. Tiu,<sup>2</sup> Amy M. Wen,<sup>1</sup> Yi Zheng,<sup>2</sup> Jonathan K. Pokorski,<sup>2</sup> Rigoberto C. Advincula,<sup>1,2,\*</sup> Nicole F. Steinmetz<sup>1,2,3,4,5\*</sup>*

<sup>1</sup>Department of Biomedical Engineering, Case Western Reserve University, Cleveland, OH 44106 USA

<sup>2</sup>Department of Macromolecular Science and Engineering, Case Western Reserve University, Cleveland, OH 44106 USA

<sup>3</sup>Department of Radiology, Case Western Reserve University, Cleveland, OH 44106 USA

<sup>4</sup>Department of Materials Science and Engineering, Case Western Reserve University, Cleveland, OH 44106 USA

<sup>5</sup>Case Comprehensive Cancer Center, Case Western Reserve University, Cleveland, OH 44106 USA

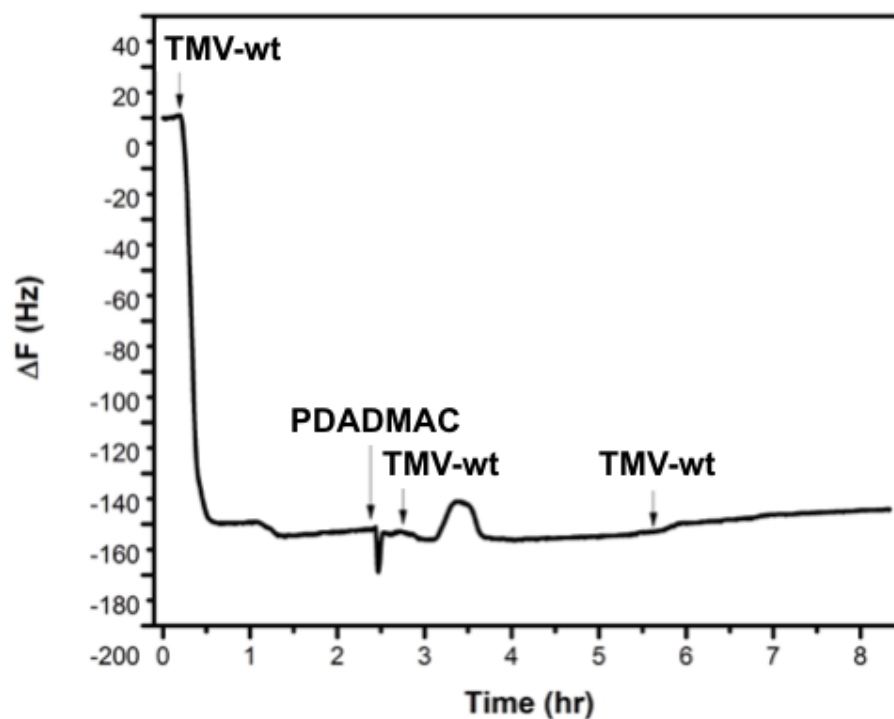

Figure S 1. QCM resonant frequency shift response during the deposition of TMV (0.1 mg/mL in 10 mM PBS pH 5.0), PDADMAC (0.1 mg/mL), and another 2 injections of TMV.

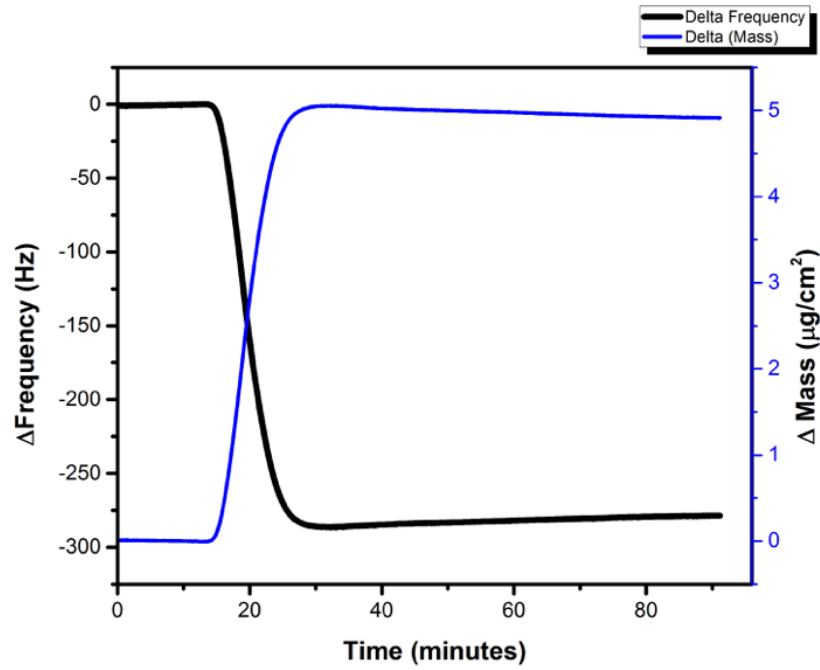

Figure S 2. The QCM adsorption curve of TMV (0.1 mg/mL in 10 mM PBS pH 5.0) onto a  $(\text{PDADMAC/PSS})_{2.5}/(\text{TMV-wt})/(\text{PDADMAC/PSS})_{12.5}$
